# Supplementary material
Source: Springer Nature journal article supplement (https://www.springermedizin.de/resource/supplementary/13075_2012_3603_MOESM10_ESM.pdf/9694898)

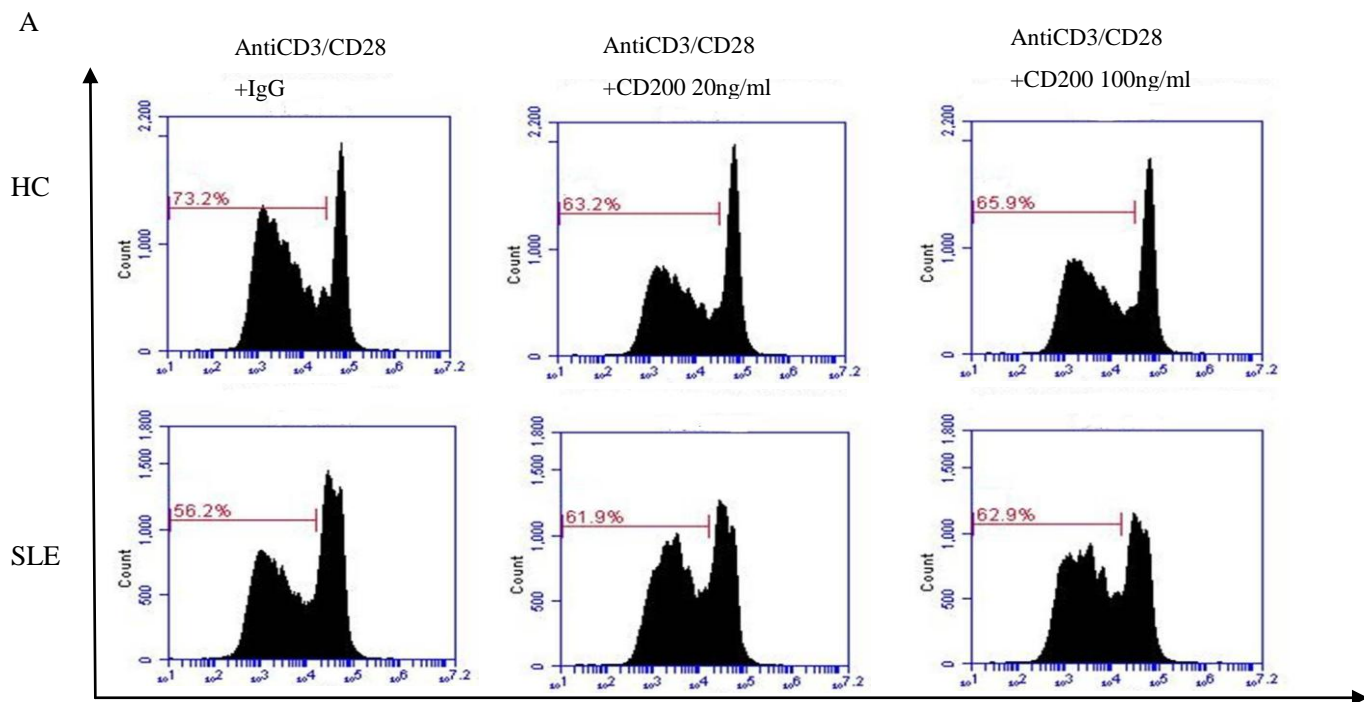

**CFSE**

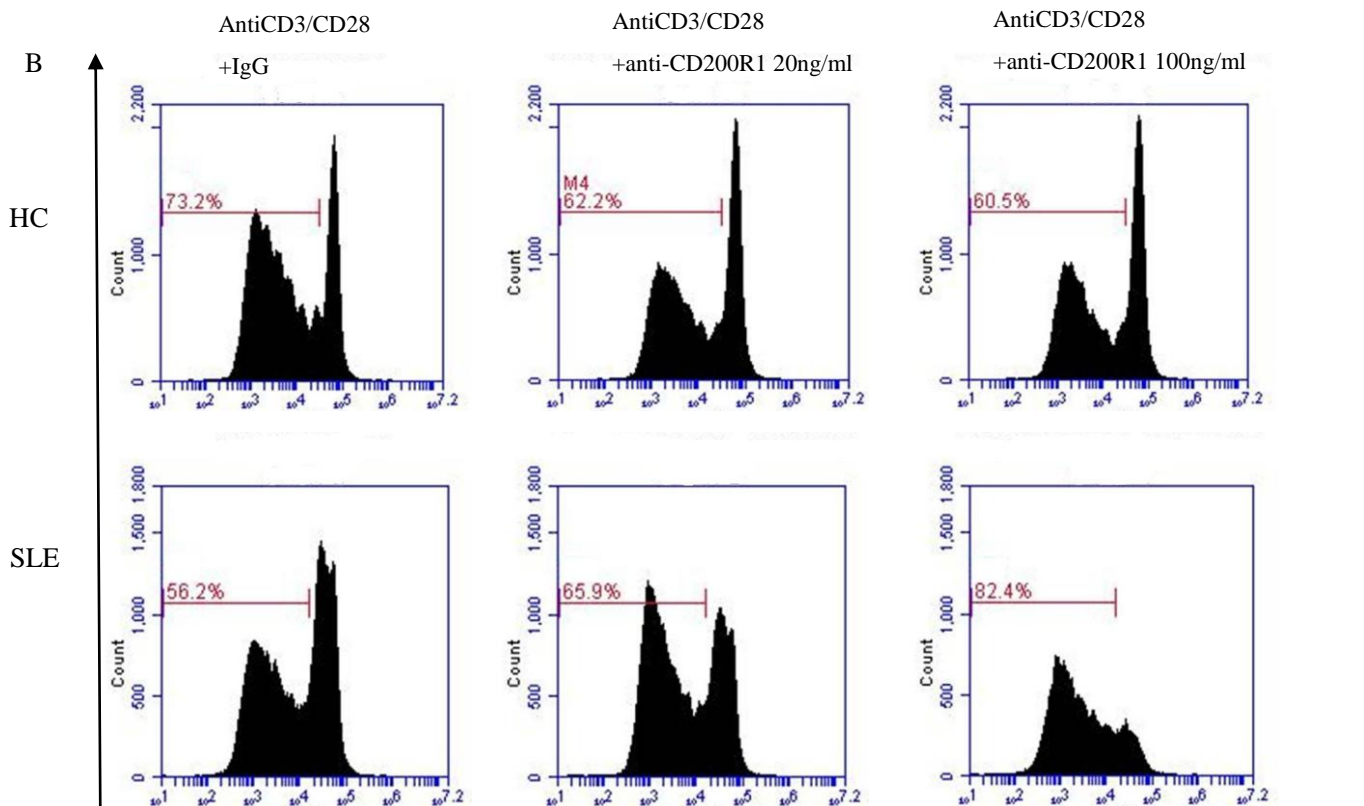

**CFSE**

Supplement: MOESM10 [file 9694898]
